# Supplementary material for: Relationships between the racemic structures of substituted mandelic acids containing 8- and 10-membered hydrogen bonded dimer rings
Source: Royal Society of Chemistry journal article supplement (doi:10.1039/c4ce01832j), 2014-01-01
Supplement: c4ce01832j1.pdf [file c4ce01832j1.pdf]

Supplementary Information

X-ray data were collected on a Rigaku AFC12 diffractometer mounted on Rigaku FR-E+ Super Bright Very High Flux rotating anode CCD diffractometer equipped with VariMax very high flux (VHF) optics and Saturn 724+ CCD detector<sup>1</sup>. The crystal structures were solved by direct methods or charge flipping and refined using full matrix least squares (refinement based on  $F^2$ ) using SHELXL<sup>2</sup>. Where the quality of data has had an effect on the structure, a footnote indicates the approach taken or the cause. Structures previously determined and reported in the literature are included with a citation and for these only pertinent crystal data i.e. unit cell dimensions and space group, are repeated here for the purposes of completeness.

Table S1. Crystal data and refinement details for all compounds compared in this study.

| Compound reference                                              | 2Br                                            | 2Cl-1 <sup>3</sup>                             | 2Cl-2 <sup>4</sup>                             | 2F-1 <sup>5</sup>                             | 2F-2                                          | 2I                                            |
|-----------------------------------------------------------------|------------------------------------------------|------------------------------------------------|------------------------------------------------|-----------------------------------------------|-----------------------------------------------|-----------------------------------------------|
| Chemical formula                                                | C <sub>8</sub> H <sub>7</sub> BrO <sub>3</sub> | C <sub>8</sub> H <sub>7</sub> ClO <sub>3</sub> | C <sub>8</sub> H <sub>7</sub> ClO <sub>3</sub> | C <sub>8</sub> H <sub>7</sub> FO <sub>3</sub> | C <sub>8</sub> H <sub>7</sub> FO <sub>3</sub> | C <sub>8</sub> H <sub>7</sub> IO <sub>3</sub> |
| Formula Mass                                                    | 231.05                                         | 186.59                                         | 186.59                                         | 170.14                                        | 170.14                                        | 278.04                                        |
| Crystal system                                                  | Triclinic                                      | Triclinic                                      | Monoclinic                                     | Monoclinic                                    | Monoclinic                                    | Triclinic                                     |
| <i>a</i> / Å                                                    | 5.708(5)                                       | 9.0874(19)                                     | 14.1961(7)                                     | 8.4238(12)                                    | 8.1888(12)                                    | 5.805(3)                                      |
| <i>b</i> / Å                                                    | 10.8436(10)                                    | 9.805(2)                                       | 8.0521(4)                                      | 5.4766(7)                                     | 10.1998(14)                                   | 10.732(6)                                     |
| <i>c</i> / Å                                                    | 14.131(14)                                     | 10.830(2)                                      | 14.4453(5)                                     | 15.959(2)                                     | 9.2654(12)                                    | 13.969(7)                                     |
| <i>α</i> / °                                                    | 96.952(19)                                     | 66.066(14)                                     | 90.00                                          | 90.00                                         | 90.00                                         | 96.527(13)                                    |
| <i>β</i> / °                                                    | 93.91(2)                                       | 74.371(14)                                     | 99.177(3)                                      | 95.962(11)                                    | 92.709(7)                                     | 92.909(13)                                    |
| <i>γ</i> / °                                                    | 90.07(2)                                       | 85.606(14)                                     | 90.00                                          | 90.00                                         | 90.00                                         | 90.058(13)                                    |
| Unit cell volume/ Å <sup>3</sup>                                | 866.2(11)                                      | 848.803                                        | 1630.08                                        | 732.267                                       | 773.02(18)                                    | 863.5(8)                                      |
| Temperature/ K                                                  | 293(2)                                         |                                                |                                                |                                               | 100(2)                                        | 100(2)                                        |
| Space group                                                     | <i>P</i> $\bar{1}$                             | <i>P</i> $\bar{1}$                             | <i>P</i> 21/ <i>c</i>                          | <i>P</i> 21/ <i>c</i>                         | <i>P</i> 21/ <i>c</i>                         | <i>P</i> $\bar{1}$                            |
| No. of formula units per unit cell, <i>Z</i>                    | 4                                              |                                                |                                                |                                               | 4                                             | 4                                             |
| Radiation type                                                  | MoK <sub>α</sub>                               |                                                |                                                |                                               | MoK <sub>α</sub>                              | MoK <sub>α</sub>                              |
| Absorption coefficient, $\mu$ / mm <sup>-1</sup>                | 4.708                                          |                                                |                                                |                                               | 0.127                                         | 3.671                                         |
| No. of reflections measured                                     | 3059                                           |                                                |                                                |                                               | 9704                                          | 10089                                         |
| No. of unique reflections                                       | 3059                                           |                                                |                                                |                                               | 1752                                          | 3043                                          |
| <i>R</i> <sub>int</sub>                                         | 0.0000 <sup>a</sup>                            |                                                |                                                |                                               | 0.0525                                        | 0.0735                                        |
| Final <i>R</i> <sub>1</sub> values ( <i>I</i> >2σ( <i>I</i> ))  | 0.0717                                         |                                                |                                                |                                               | 0.0602                                        | 0.0602                                        |
| Final <i>wR</i> <sub>2</sub> values ( <i>I</i> >2σ( <i>I</i> )) | 0.1576                                         |                                                |                                                |                                               | 0.1587                                        | 0.1284                                        |
| Final <i>R</i> <sub>1</sub> values (all data)                   | 0.1070                                         |                                                |                                                |                                               | 0.0847                                        | 0.0799                                        |
| Final <i>wR</i> <sub>2</sub> values (all data)                  | 0.1788                                         |                                                |                                                |                                               | 0.1743                                        | 0.1360                                        |
| Goodness of fit on <i>F</i> <sub>2</sub>                        | 1.204                                          |                                                |                                                |                                               | 1.061                                         | 1.090                                         |
| CCDC ID                                                         | CCDC<br>1007650                                | CSD<br>GUMXAO02                                | CSD<br>GUMXAO                                  | CSD<br>WESBEB                                 | CCDC<br>1007651                               | CCDC<br>1007652                               |

<sup>a</sup> HKLF5 twin

| Compound reference                                                        | 2Me                                           | 3Br-1                                          | 3Br-2                                          | 3Cl-1 <sup>6</sup>                             | 3Cl-2 <sup>4</sup>                             | 3Cl-3                                          |
|---------------------------------------------------------------------------|-----------------------------------------------|------------------------------------------------|------------------------------------------------|------------------------------------------------|------------------------------------------------|------------------------------------------------|
| Chemical formula                                                          | C <sub>9</sub> H <sub>10</sub> O <sub>3</sub> | C <sub>8</sub> H <sub>7</sub> BrO <sub>3</sub> | C <sub>8</sub> H <sub>7</sub> BrO <sub>3</sub> | C <sub>8</sub> H <sub>7</sub> ClO <sub>3</sub> | C <sub>8</sub> H <sub>7</sub> ClO <sub>3</sub> | C <sub>8</sub> H <sub>7</sub> ClO <sub>3</sub> |
| Formula Mass                                                              | 166.17                                        | 231.05                                         | 231.05                                         | 186.59                                         | 186.59                                         | 186.59                                         |
| Crystal system                                                            | Triclinic                                     | Monoclinic                                     | Triclinic                                      | Monoclinic                                     | Triclinic                                      | Monoclinic                                     |
| <i>a</i> / Å                                                              | 8.833(5)                                      | 8.8529(7)                                      | 8.8285(5)                                      | 8.6234(12)                                     | 8.5962(7)                                      | 8.6521(15)                                     |
| <i>b</i> / Å                                                              | 9.263(5)                                      | 8.9210(6)                                      | 9.3102(7)                                      | 10.4812(14)                                    | 9.2752(7)                                      | 8.9195(15)                                     |
| <i>c</i> / Å                                                              | 10.750(5)                                     | 10.7745(8)                                     | 10.4698(7)                                     | 9.3924(13)                                     | 10.3929(8)                                     | 10.7309(17)                                    |
| <i>α</i> / °                                                              | 73.230(5)                                     | 90.00                                          | 92.436(8)                                      | 90.00                                          | 91.527(6)                                      | 90.00                                          |
| <i>β</i> / °                                                              | 81.067(5)                                     | 90.568(6)                                      | 90.260(8)                                      | 93.846(7)                                      | 90.339(6)                                      | 90.900(6)                                      |
| <i>γ</i> / °                                                              | 77.849(5)                                     | 90.00                                          | 94.119(8)                                      | 90.00                                          | 93.360(7)                                      | 90.00                                          |
| Unit cell volume/ Å <sup>3</sup>                                          | 819.1(7)                                      | 850.89(11)                                     | 857.54(10)                                     | 847.0(2)                                       | 826.9                                          | 828.0(2)                                       |
| Temperature/ K                                                            | 120(2)                                        | 100(2)                                         | 100(2)                                         |                                                |                                                | 100(2)                                         |
| Space group                                                               | <i>P</i> $\bar{1}$                            | <i>P</i> 2 <sub>1</sub> / <i>c</i>             | <i>P</i> $\bar{1}$                             | <i>P</i> 2 <sub>1</sub> / <i>c</i>             | <i>P</i> $\bar{1}$                             | <i>P</i> 2 <sub>1</sub> / <i>c</i>             |
| No. of formula units per unit cell, <i>Z</i>                              | 2                                             | 4                                              | 4                                              |                                                |                                                | 4                                              |
| Radiation type                                                            | MoK $\alpha$                                  | MoK $\alpha$                                   | MoK $\alpha$                                   |                                                |                                                | MoK $\alpha$                                   |
| Absorption coefficient, $\mu$ / mm <sup>-1</sup>                          | 0.101                                         | 4.792                                          | 4.755                                          |                                                |                                                | 0.421                                          |
| No. of reflections measured                                               | 16751                                         | 4482                                           | 10931                                          |                                                |                                                | 5526                                           |
| No. of unique reflections                                                 | 3744                                          | 1949                                           | 3907                                           |                                                |                                                | 1895                                           |
| <i>R</i> <sub>int</sub>                                                   | 0.0492                                        | 0.0315                                         | 0.0646                                         |                                                |                                                | 0.0674                                         |
| Final <i>R</i> <sub>1</sub> values ( <i>I</i> > 2 $\sigma$ ( <i>I</i> ))  | 0.0443                                        | 0.0264                                         | 0.0516                                         |                                                |                                                | 0.0554                                         |
| Final <i>wR</i> <sub>2</sub> values ( <i>I</i> > 2 $\sigma$ ( <i>I</i> )) | 0.1082                                        | 0.0646                                         | 0.0864                                         |                                                |                                                | 0.1217                                         |
| Final <i>R</i> <sub>1</sub> values (all data)                             | 0.0653                                        | 0.0299                                         | 0.0984                                         |                                                |                                                | 0.0964                                         |
| Final <i>wR</i> <sub>2</sub> values (all data)                            | 0.1212                                        | 0.0678                                         | 0.1005                                         |                                                |                                                | 0.1395                                         |
| Goodness of fit on <i>F</i> <sub>2</sub>                                  | 1.052                                         | 1.064                                          | 1.036                                          |                                                |                                                | 1.050                                          |
| CCDC ID                                                                   | CCDC<br>1007653                               | CCDC<br>1007654                                | CCDC<br>1007655                                | CSD<br>FIZPIP00                                | CSD<br>FIZPEL00                                | CCDC<br>10077656                               |

| Compound reference                                                        | 3F <sub>3</sub> C-1                                         | 3F-1                                          | 3F-2                                          | 3I                                            | 3Me-1                                         | 4Br                                            |
|---------------------------------------------------------------------------|-------------------------------------------------------------|-----------------------------------------------|-----------------------------------------------|-----------------------------------------------|-----------------------------------------------|------------------------------------------------|
| Chemical formula                                                          | C <sub>9</sub> H <sub>7</sub> F <sub>3</sub> O <sub>3</sub> | C <sub>8</sub> H <sub>7</sub> FO <sub>3</sub> | C <sub>8</sub> H <sub>7</sub> FO <sub>3</sub> | C <sub>8</sub> H <sub>7</sub> IO <sub>3</sub> | C <sub>9</sub> H <sub>10</sub> O <sub>3</sub> | C <sub>8</sub> H <sub>7</sub> BrO <sub>3</sub> |
| Formula Mass                                                              | 220.15                                                      | 170.14                                        | 170.14                                        | 278.04                                        | 166.17                                        | 231.05                                         |
| Crystal system                                                            | Triclinic                                                   | Monoclinic                                    | Triclinic                                     | Triclinic                                     | Triclinic                                     | Monoclinic                                     |
| <i>a</i> / Å                                                              | 9.0086(5)                                                   | 8.1424(6)                                     | 5.0748(10)                                    | 6.8488(4)                                     | 8.5713(5)                                     | 19.5315(14)                                    |
| <i>b</i> / Å                                                              | 9.6372(7)                                                   | 10.2396(7)                                    | 5.2814(10)                                    | 14.1055(10)                                   | 9.3327(7)                                     | 9.7410(7)                                      |
| <i>c</i> / Å                                                              | 10.5702(7)                                                  | 9.3604(6)                                     | 15.032(4)                                     | 15.0534(10)                                   | 10.5393(7)                                    | 9.1389(6)                                      |
| <i>α</i> / °                                                              | 86.602(5)                                                   | 90.00                                         | 91.142(7)                                     | 104.634(7)                                    | 92.391(6)                                     | 90.00                                          |
| <i>β</i> / °                                                              | 88.612(5)                                                   | 91.016(8)                                     | 92.370(7)                                     | 94.543(7)                                     | 94.241(6)                                     | 101.132(4)                                     |
| <i>γ</i> / °                                                              | 85.623(4)                                                   | 90.00                                         | 111.420(8)                                    | 90.699(6)                                     | 90.556(6)                                     | 90.00                                          |
| Unit cell volume/ Å <sup>3</sup>                                          | 913.22(10)                                                  | 780.30(9)                                     | 374.47(14)                                    | 1401.86(16)                                   | 839.96(10)                                    | 1706.0(2)                                      |
| Temperature/ K                                                            | 100(2)                                                      | 293(2)                                        | 100(2)                                        | 100(2)                                        | 100(2)                                        | 100(2)                                         |
| Space group                                                               | <i>P</i> $\bar{1}$                                          | <i>P</i> 2 <sub>1</sub> / <i>c</i>            | <i>P</i> $\bar{1}$                            | <i>P</i> $\bar{1}$                            | <i>P</i> $\bar{1}$                            | <i>P</i> 2 <sub>1</sub> / <i>c</i>             |
| No. of formula units per unit cell, <i>Z</i>                              | 4                                                           | 4                                             | 2                                             | 6                                             | 4                                             | 8                                              |
| Radiation type                                                            | MoK $\alpha$                                                | MoK $\alpha$                                  | MoK $\alpha$                                  | MoK $\alpha$                                  | MoK $\alpha$                                  | MoK $\alpha$                                   |
| Absorption coefficient, $\mu$ / mm <sup>-1</sup>                          | 0.158                                                       | 0.126                                         | 0.131                                         | 3.391                                         | 0.099                                         | 4.780                                          |
| No. of reflections measured                                               | 11653                                                       | 4601                                          | 3166                                          | 16687                                         | 10784                                         | 3843                                           |
| No. of unique reflections                                                 | 4128                                                        | 1372                                          | 1677                                          | 4945                                          | 3847                                          | 3843                                           |
| <i>R</i> <sub>int</sub>                                                   | 0.0393                                                      | 0.0899                                        | 0.0354                                        | 0.0462                                        | 0.0558                                        | 0.0000 <sup>b</sup>                            |
| Final <i>R</i> <sub>1</sub> values ( <i>I</i> > 2 $\sigma$ ( <i>I</i> ))  | 0.0538                                                      | 0.1026                                        | 0.0616                                        | 0.0549                                        | 0.0513                                        | 0.0847                                         |
| Final <i>wR</i> <sub>2</sub> values ( <i>I</i> > 2 $\sigma$ ( <i>I</i> )) | 0.1263                                                      | 0.2744                                        | 0.1550                                        | 0.1094                                        | 0.1174                                        | 0.2070                                         |
| Final <i>R</i> <sub>1</sub> values (all data)                             | 0.0688                                                      | 0.1836                                        | 0.0906                                        | 0.0853                                        | 0.0798                                        | 0.1130                                         |
| Final <i>wR</i> <sub>2</sub> values (all data)                            | 0.1323                                                      | 0.3223                                        | 0.1666                                        | 0.1200                                        | 0.1319                                        | 0.2205                                         |
| Goodness of fit on <i>F</i> <sub>2</sub>                                  | 1.123                                                       | 1.080                                         | 1.116                                         | 1.045                                         | 1.032                                         | 1.161                                          |
| CCDC ID                                                                   | CCDC<br>1007657                                             | CCDC<br>1007658                               | CCDC<br>1008570                               | CCDC<br>1007659                               | CCDC<br>1007660                               | CCDC<br>1007661                                |

<sup>b</sup> HKLF5 twin

| Compound reference                                                     | 4Cl <sup>c</sup>                               | 4F <sub>3</sub> C                                           | 4F <sup>3</sup>                               | 4I                                            | 4Me                                           | 4MeO-1                                        |
|------------------------------------------------------------------------|------------------------------------------------|-------------------------------------------------------------|-----------------------------------------------|-----------------------------------------------|-----------------------------------------------|-----------------------------------------------|
| Chemical formula                                                       | C <sub>8</sub> H <sub>7</sub> ClO <sub>3</sub> | C <sub>9</sub> H <sub>7</sub> F <sub>3</sub> O <sub>3</sub> | C <sub>8</sub> H <sub>7</sub> FO <sub>3</sub> | C <sub>8</sub> H <sub>7</sub> IO <sub>3</sub> | C <sub>9</sub> H <sub>10</sub> O <sub>3</sub> | C <sub>9</sub> H <sub>10</sub> O <sub>4</sub> |
| Formula Mass                                                           | 186.59                                         | 220.15                                                      | 170.14                                        | 278.04                                        | 166.17                                        | 182.17                                        |
| Crystal system                                                         | Triclinic                                      | Orthorhombic                                                | Orthorhombic                                  | Triclinic                                     | Orthorhombic                                  | Orthorhombic                                  |
| <i>a</i> / Å                                                           | 4.9711(4)                                      | 9.8173(5)                                                   | 9.4685(9)                                     | 4.9583(5)                                     | 9.8365(7)                                     | 20.805(3)                                     |
| <i>b</i> / Å                                                           | 14.9062(12)                                    | 9.6920(5)                                                   | 16.497(2)                                     | 10.3607(11)                                   | 9.4215(7)                                     | 15.649(3)                                     |
| <i>c</i> / Å                                                           | 16.7920(13)                                    | 19.9217(14)                                                 | 9.7677(8)                                     | 17.675(2)                                     | 19.2390(15)                                   | 5.3033(7)                                     |
| <i>α</i> / °                                                           | 88.109(8)                                      | 90.00                                                       | 90                                            | 76.455(5)                                     | 90.00                                         | 90.00                                         |
| <i>β</i> / °                                                           | 85.871(8)                                      | 90.00                                                       | 90                                            | 83.237(6)                                     | 90.00                                         | 90.00                                         |
| <i>γ</i> / °                                                           | 84.381(9)                                      | 90.00                                                       | 90                                            | 88.779(6)                                     | 90.00                                         | 90.00                                         |
| Unit cell volume/ Å <sup>3</sup>                                       | 1234.68(17)                                    | 1895.54(19)                                                 | 1525.73                                       | 876.58(16)                                    | 1783.0(2)                                     | 1726.6(5)                                     |
| Temperature/ K                                                         | 100(2)                                         | 293(2)                                                      |                                               | 100(2)                                        | 100(2)                                        | 293(2)                                        |
| Space group                                                            | <i>P</i> $\bar{1}$                             | <i>Pbca</i>                                                 | <i>Pbca</i>                                   | <i>P</i> $\bar{1}$                            | <i>Pbca</i>                                   | <i>Pbca</i>                                   |
| No. of formula units per unit cell, <i>Z</i>                           | 6                                              | 8                                                           |                                               | 4                                             | 8                                             | 8                                             |
| Radiation type                                                         | MoK <sub>α</sub>                               | MoK <sub>α</sub>                                            |                                               | MoK <sub>α</sub>                              | MoK <sub>α</sub>                              | MoK <sub>α</sub>                              |
| Absorption coefficient, μ/ mm <sup>-1</sup>                            | 0.424                                          | 0.152                                                       |                                               | 3.616                                         | 0.093                                         | 0.111                                         |
| No. of reflections measured                                            | 8678                                           | 30644                                                       |                                               | 8571                                          | 15878                                         | 16890                                         |
| No. of unique reflections                                              | 4218                                           | 2173                                                        |                                               | 4017                                          | 2038                                          | 1971                                          |
| <i>R</i> <sub>int</sub>                                                | 0.1684                                         | 0.0735                                                      |                                               | 0.0596                                        | 0.1212                                        | 0.1451                                        |
| Final <i>R</i> <sub><i>I</i></sub> values ( <i>I</i> > 2σ( <i>I</i> )) | 0.1238                                         | 0.0832                                                      |                                               | 0.0615                                        | 0.0710                                        | 0.0767                                        |
| Final <i>wR</i> <sub>2</sub> values ( <i>I</i> > 2σ( <i>I</i> ))       | 0.2195                                         | 0.1104                                                      |                                               | 0.1576                                        | 0.1594                                        | 0.1049                                        |
| Final <i>R</i> <sub><i>I</i></sub> values (all data)                   | 0.3050                                         | 0.1612                                                      |                                               | 0.0852                                        | 0.1920                                        | 0.1957                                        |
| Final <i>wR</i> <sub>2</sub> values (all data)                         | 0.3039                                         | 0.1300                                                      |                                               | 0.1692                                        | 0.2198                                        | 0.1320                                        |
| Goodness of fit on <i>F</i> <sub>2</sub>                               | 1.010                                          | 1.133                                                       |                                               | 1.063                                         | 0.996                                         | 0.992                                         |
| CCDC ID                                                                | CCDC                                           | CCDC                                                        | CSD                                           | CCDC                                          | CCDC                                          | CCDC                                          |
|                                                                        | 1007662                                        | 1007663                                                     | WESBOL                                        | 1007664                                       | 1007665                                       | 1007666                                       |

| Compound reference                                                     | 4MeO-2                                        | MA-1 <sup>7</sup>                            | MA-2 <sup>8</sup>                            |
|------------------------------------------------------------------------|-----------------------------------------------|----------------------------------------------|----------------------------------------------|
| Chemical formula                                                       | C <sub>9</sub> H <sub>10</sub> O <sub>4</sub> | C <sub>8</sub> H <sub>8</sub> O <sub>3</sub> | C <sub>8</sub> H <sub>8</sub> O <sub>3</sub> |
| Formula Mass                                                           | 182.17                                        | 152.05                                       | 152.05                                       |
| Crystal system                                                         | Monoclinic                                    | Orthorhombic                                 | Monoclinic                                   |
| <i>a</i> / Å                                                           | 18.6794(13)                                   | 9.669(2)                                     | 5.84680(10)                                  |
| <i>b</i> / Å                                                           | 5.1376(2)                                     | 16.183(3)                                    | 29.2410(4)                                   |
| <i>c</i> / Å                                                           | 9.214(4)                                      | 9.953(2)                                     | 8.72280(10)                                  |
| <i>α</i> / °                                                           | 90.00                                         | 90                                           | 90                                           |
| <i>β</i> / °                                                           | 103.682(12)                                   | 90                                           | 92.1651(8)                                   |
| <i>γ</i> / °                                                           | 90.00                                         | 90                                           | 90                                           |
| Unit cell volume/ Å <sup>3</sup>                                       | 859.1(3)                                      | 1557.38                                      | 1490.24                                      |
| Temperature/ K                                                         | 293(2)                                        |                                              |                                              |
| Space group                                                            | <i>P</i> 2 <sub>1</sub> / <i>c</i>            | <i>Pbca</i>                                  | <i>P</i> 2 <sub>1</sub> / <i>c</i>           |
| No. of formula units per unit cell, <i>Z</i>                           | 4                                             |                                              |                                              |
| Radiation type                                                         | MoK <sub>α</sub>                              |                                              |                                              |
| Absorption coefficient, μ/ mm <sup>-1</sup>                            | 0.112                                         |                                              |                                              |
| No. of reflections measured                                            | 18014                                         |                                              |                                              |
| No. of unique reflections                                              | 1971                                          |                                              |                                              |
| <i>R</i> <sub>int</sub>                                                | 0.0294                                        |                                              |                                              |
| Final <i>R</i> <sub><i>I</i></sub> values ( <i>I</i> > 2σ( <i>I</i> )) | 0.0336                                        |                                              |                                              |
| Final <i>wR</i> <sub>2</sub> values ( <i>I</i> > 2σ( <i>I</i> ))       | 0.0916                                        |                                              |                                              |
| Final <i>R</i> <sub><i>I</i></sub> values (all data)                   | 0.0433                                        |                                              |                                              |
| Final <i>wR</i> <sub>2</sub> values (all data)                         | 0.0958                                        |                                              |                                              |
| Goodness of fit on <i>F</i> <sub>2</sub>                               | 1.098                                         |                                              |                                              |
| CCDC ID                                                                | CCDC                                          | CSD                                          | CSD                                          |
|                                                                        | 1007667                                       | DLMAND01                                     | DLMAND02                                     |

<sup>c</sup> Poor quality crystal obtained from sublimation was only one available for analysis.
